# Supplementary material for: Effect of Early-Life Fluoxetine on Anxiety-Like Behaviors in BDNF Val66Met Mice
Source: Atypon-hosted journal article supplement (doi:10.1176/appi.ajp.2017.15121592), 2017-10-31
Supplement: appi.ajp.2017.15121592.ds001.pdf [file appi.ajp.2017.15121592.ds001.pdf]

## Contents

- **Supplemental Methods**
- **Figures S1–S4**
- **Table S1**

### Supplemental Methods

#### Western blot analysis

Dissected tissues were minced and lysed in lysis buffer (1x Tris buffered saline (TBS), 1% NP-40, 1% Triton-100, 1 mM PMSF, 10% glycerol, and protease inhibitor cocktail (Sigma)) for 30 minutes on ice. Lysates were further triturated using a 30 g needle, and supernatants collected following centrifugation at 14,000 rpm for 5 minutes. Following transfer, Western blots were developed using incubation with primary antibodies (anti-HA.11 antibody at 1:3000 dilution, Covance; anti-p75 antibody at 1:1000, R&D) then with HRP-conjugated secondary antibodies and developed with the ECL kit (Amersham). For the quantification, ImageJ software was used to analyze the Western blot bands, and statistical significance was determined by two-tailed Student's *t*-test. Results are expressed as the mean  $\pm$  SD.

**FIGURE S1. Effect of Early-life Fluoxetine on Fear Learning in BDNF<sup>Met/Met</sup> Mice**

Freezing behavior was assessed for wild-type (Val/Val) and BDNF<sup>Met/Met</sup> (Met/Met) littermate mice treated with or without FLX at P21-42. Results are presented as means  $\pm$ SD determined from the analysis of 8-15 mice per group. Two-way ANOVA of late trials with Bonferroni post hoc, \*\*\*\* $P < 0.0001$  (comparing water treated wild-type mice to fluoxetine treated BDNF<sup>Met/Met</sup> littermates); # $P < 0.0001$  (comparing water treated wild-type mice to water treated BDNF<sup>Met/Met</sup> littermates).

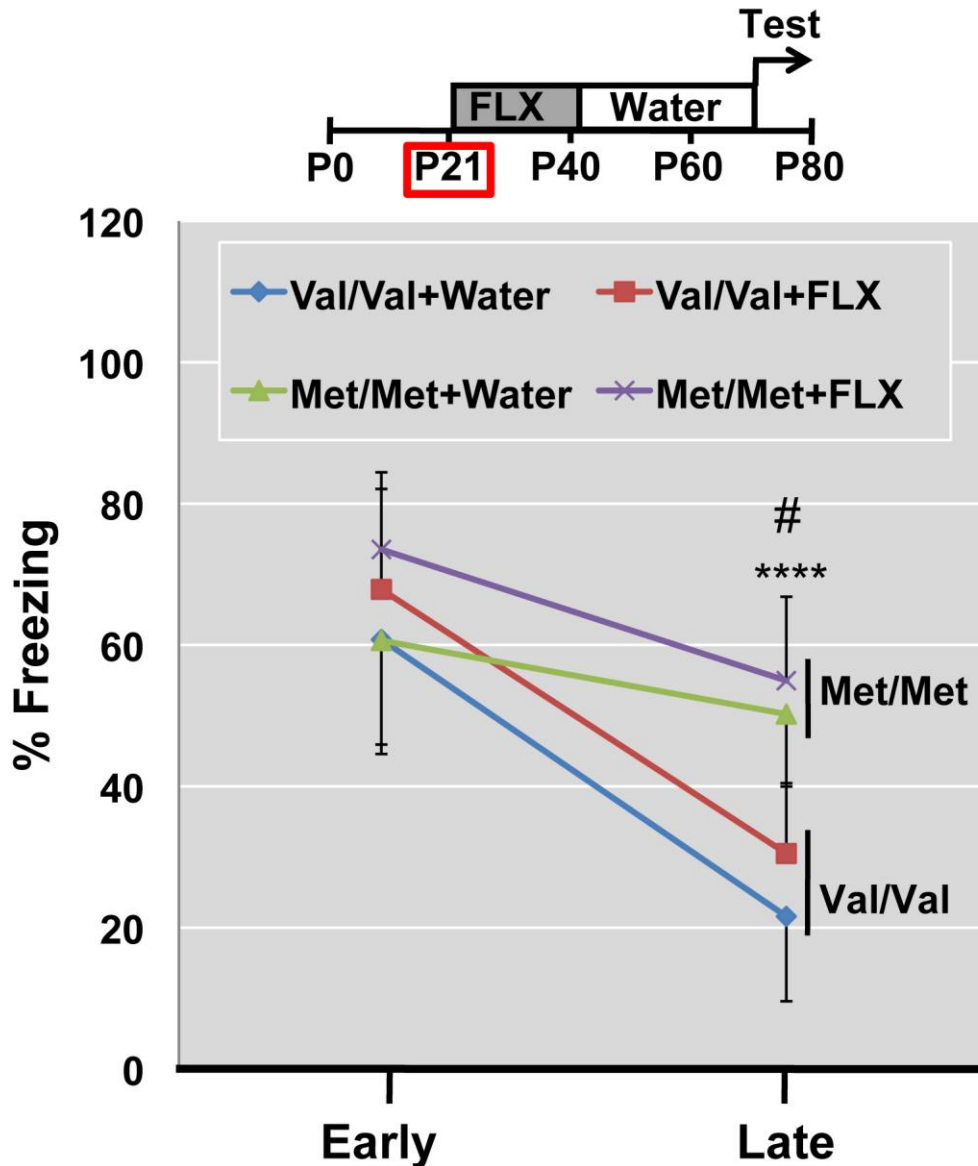

## FIGURE S2. Effects of Fluoxetine on Hippocampal BDNF Levels

In Panel A, total BDNF protein levels were assessed using ELISA in BDNF-HA mice treated with or without fluoxetine at three developmental periods. Hippocampi were harvested on last day of treatment, except in the P21-42 group with a 3-week wash out. N=10 mice per group. Western blot analysis permits assessment of proBDNF and mature BDNF levels (Panel B) and p75 levels (Panel C) in hippocampi of mice expressing HA tagged wild-type BDNF treated with or without fluoxetine at P21-41, 40-61 or P60-81. Total BDNF protein content was assessed using ELISA (Panel D) in hippocampi of wild-type (Val/Val) mice and BDNF<sup>Met/Met</sup> (Met/Met) littermates treated with or without FLX P21-42. Hippocampi were harvested on last day of treatment. N=10 mice per group. All results are presented as means  $\pm$ SD. \* $P$ <0.05, \*\*\* $P$ <0.001, \*\*\*\* $P$ <0.0001

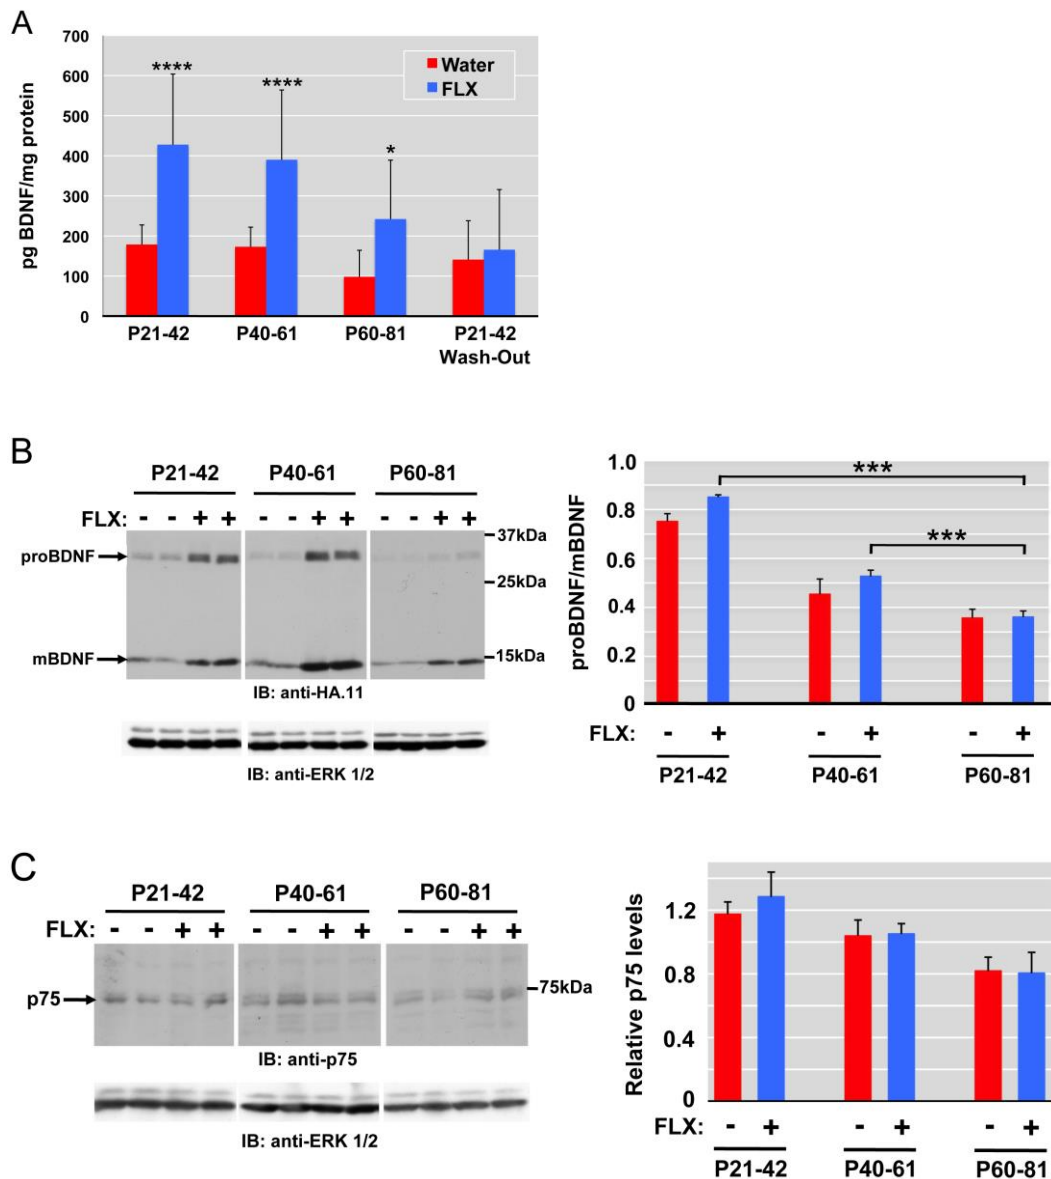

D

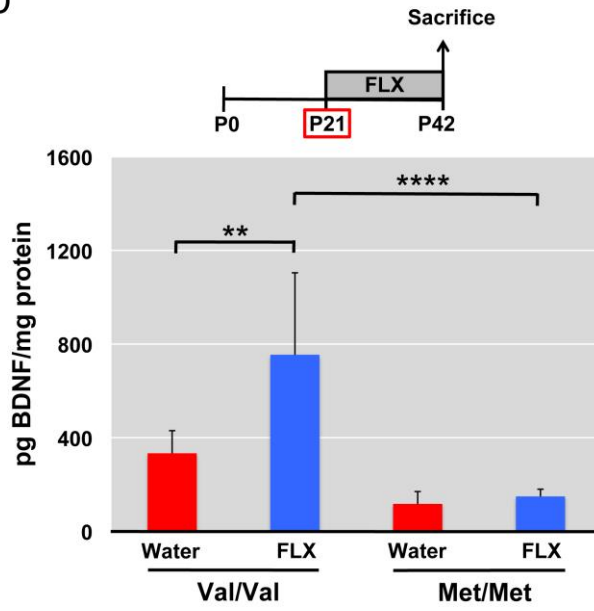

**FIGURE S3. Effect of Fluoxetine on Serotonergic Fiber Density and Cell Number**

Panel A shows density of serotonin transporter (SERT) immunoreactive fibers in ventral CA1 (vCA1), which were analyzed in  $BDNF^{Met/Met}$  mice and wild-type controls treated with or without fluoxetine at P21-42. Panel B shows density of serotonin transporter (SERT) immunoreactive fibers in infralimbic prefrontal cortex, which were analyzed in  $BDNF^{Met/Met}$  mice and wild-type controls treated with or without fluoxetine at P60-81. Panel C shows serotonin immunoreactive cells in dorsal raphe nucleus of  $BDNF$  Val/Val and Met/Met mice treated with or without fluoxetine at P21-42. All results are presented as means  $\pm$ SD determined from the analysis of 5 mice per group. \* $P < 0.05$ , \*\* $P < 0.01$ , \*\*\* $P < 0.001$

**A**

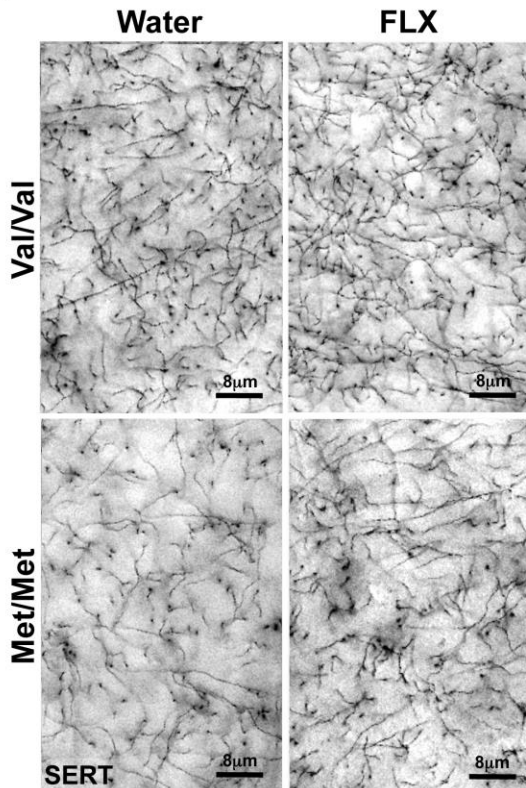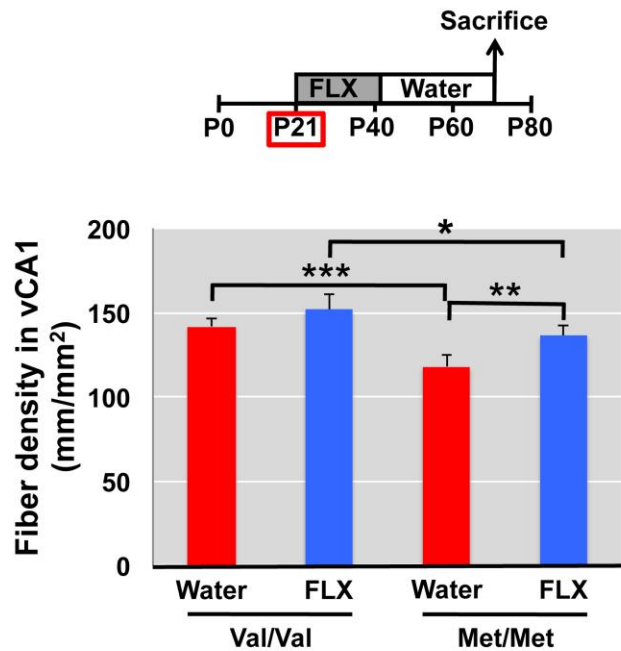

**B**

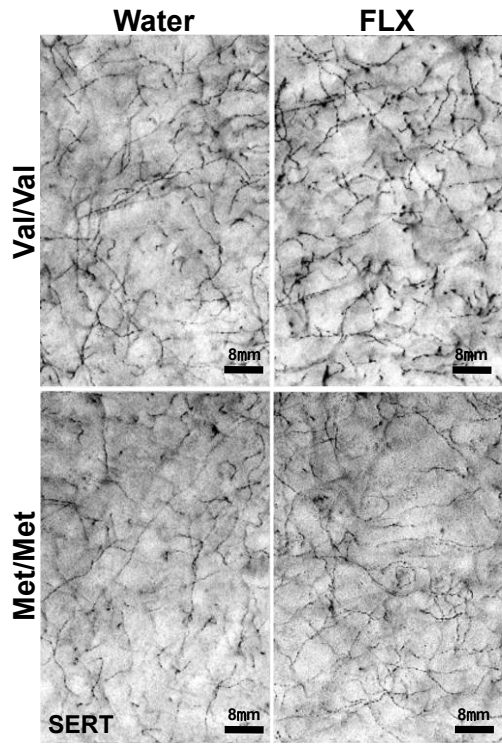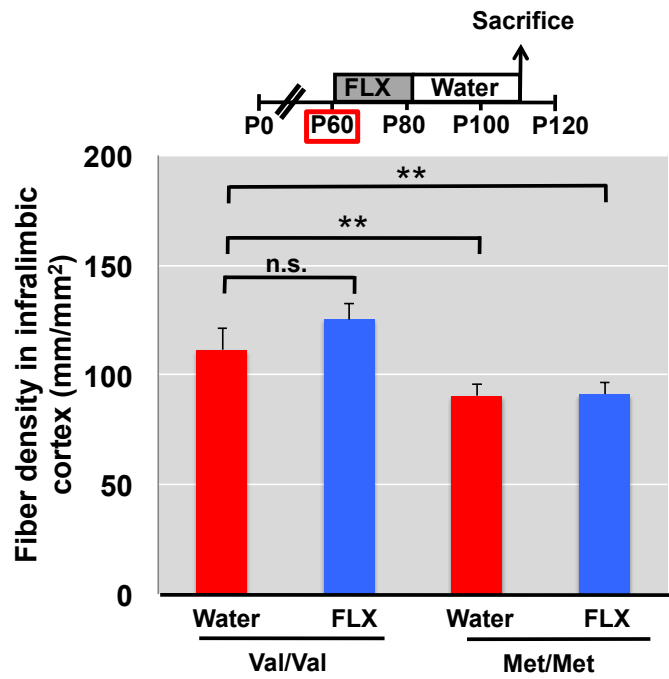

**C**

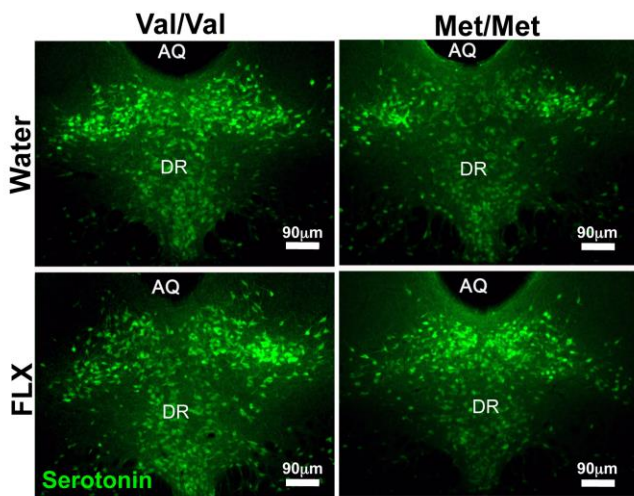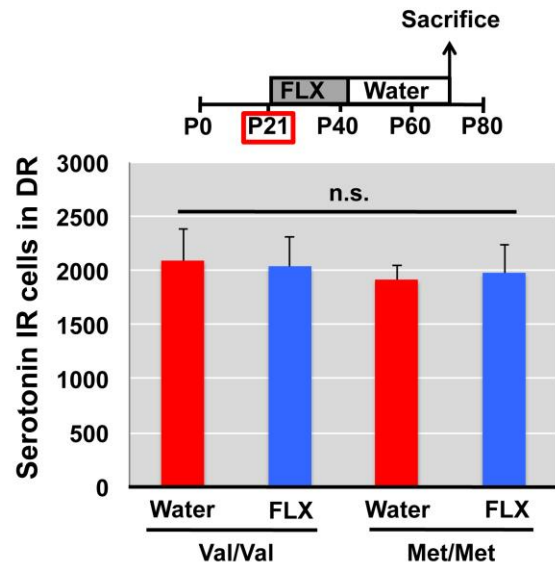

**FIGURE S4. Effect of Fluoxetine on S100B Expression**

Panel A shows analysis of S100B immunoreactive cells in dorsal raphe of  $BDNF^{Met/Met}$  mice (Met/Met) and wild-type controls (Val/Val) treated with or without fluoxetine at P60-81. Panel B shows analysis of S100B immunoreactive cells in dorsal hippocampus of  $BDNF^{Met/Met}$  mice (Met/Met) and wild-type controls (Val/Val) treated with or without fluoxetine at P21-42. Results are presented as means  $\pm$ SD determined from the analysis of 5 mice per group. \*\*\* $P < 0.001$ , \*\*\*\* $P < 0.0001$

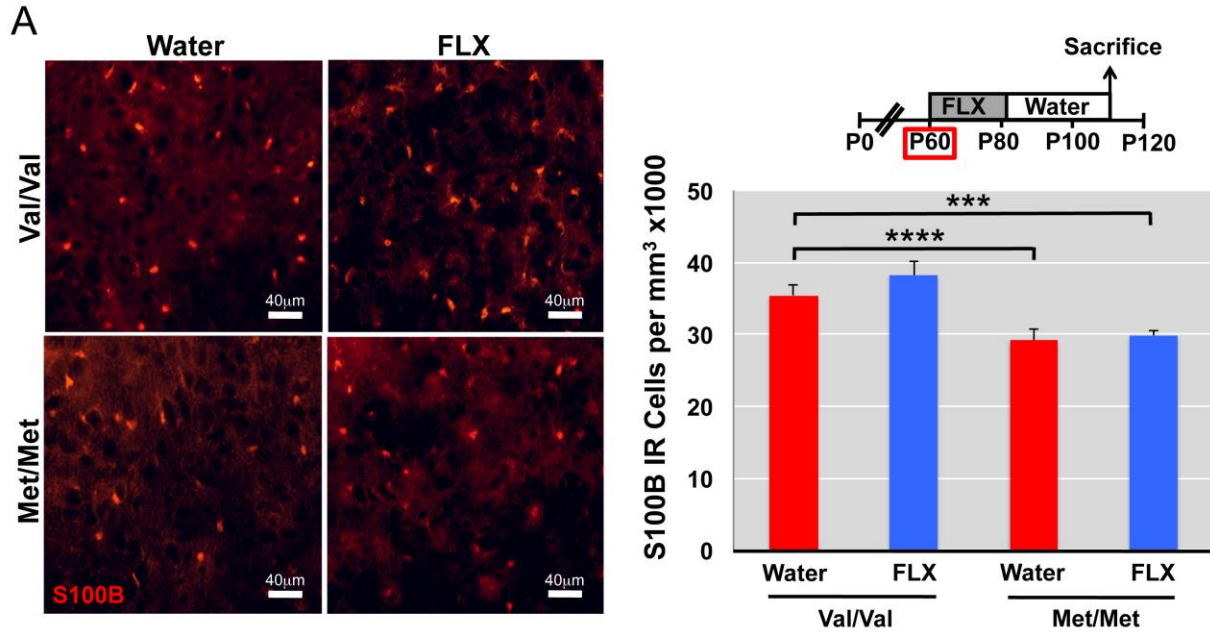

B

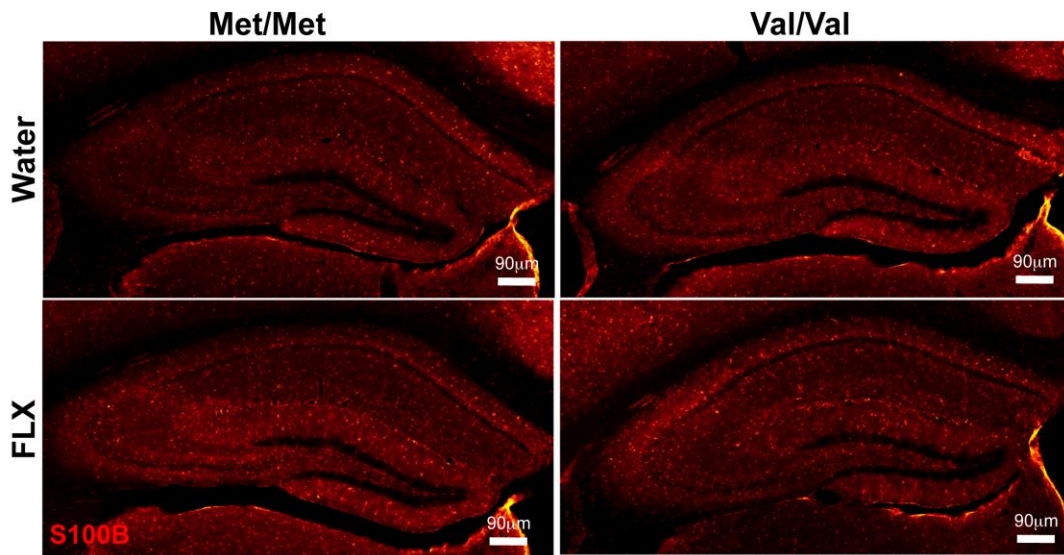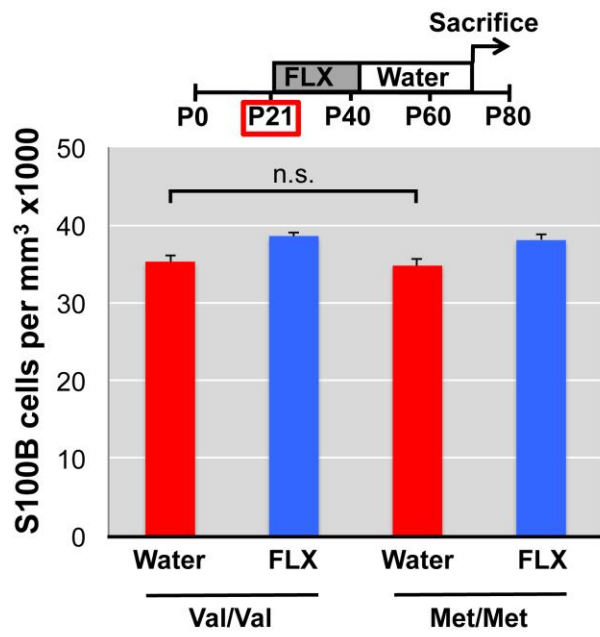



**TABLE S1. Effect of Age in Analyses of Adult Mice**

Student's t-tests analysis comparing P21-42 vs P60-81 for water treated animals for S100B expression and 5HT fiber density and one-way ANOVA analysis comparing P21 vs P40 vs P60 for water treated animals.

| Experiment                         | Statistical Analysis                                                                                                                                                                                                                      |
|------------------------------------|-------------------------------------------------------------------------------------------------------------------------------------------------------------------------------------------------------------------------------------------|
| S100B expression                   | BDNF <sup>Val/Val</sup> water at P21-42 vs P60-81<br>AVG: 34739.152; 35416.238<br>t=0.52961 P=0.610762<br>BDNF <sup>Met/Met</sup> water at P21-42 vs P60-81<br>AVG: 29121.494; 29183.928<br>t= 0.06348 P= 0.95094                         |
| 5HT fiber density                  | BDNF <sup>Val/Val</sup> water at P21-42 vs P60-81<br>AVG 120.128; 111.346<br>t=0.52961 P=0.610762<br>BDNF <sup>Met/Met</sup> water at P21-42 vs P60-81<br>AVG: 81.968; 90.33<br>t=1.20577 P= 0.262356                                     |
| Novelty induced hypophagia latency | BDNF <sup>Val/Val</sup> water at P21-42 vs P40-61 vs P60-81<br>AVG: 249.1; 116.05; 184.64<br>F(2,42)=1.94 P=0.1569<br>BDNF <sup>Met/Met</sup> water at P21-42 vs P40-61 vs P60-81<br>AVG: 540.86; 402.37; 448.31<br>F(2,29)=1.51 P=0.2373 |
